# Supplementary material for: Polyyne formation via skeletal rearrangement induced by atomic manipulation
Source: Springer Nature journal article supplement (doi:10.1038/s41557-018-0067-y), 2018-06-29
Supplement: 41557_2018_67_MOESM31_ESM.mol [file 41557_2018_67_MOESM31_ESM.mol]

nchem.17091965B-comp7.mol
  ChemDraw04111814372D

 24 25  0  0  0  0  0  0  0  0999 V2000
   -6.6000    0.7145    0.0000 C   0  0  0  0  0  0  0  0  0  0  0  0
   -7.0125   -0.0000    0.0000 C   0  0  0  0  0  0  0  0  0  0  0  0
   -6.6000   -0.7145    0.0000 C   0  0  0  0  0  0  0  0  0  0  0  0
   -5.7750   -0.7145    0.0000 C   0  0  0  0  0  0  0  0  0  0  0  0
   -5.3625   -0.0000    0.0000 C   0  0  0  0  0  0  0  0  0  0  0  0
   -5.7750    0.7145    0.0000 C   0  0  0  0  0  0  0  0  0  0  0  0
   -4.5375   -0.0000    0.0000 C   0  0  0  0  0  0  0  0  0  0  0  0
   -3.7125   -0.0000    0.0000 C   0  0  0  0  0  0  0  0  0  0  0  0
   -2.8875   -0.0000    0.0000 C   0  0  0  0  0  0  0  0  0  0  0  0
   -2.0625   -0.0000    0.0000 C   0  0  0  0  0  0  0  0  0  0  0  0
   -1.2375   -0.0000    0.0000 C   0  0  0  0  0  0  0  0  0  0  0  0
   -0.4125   -0.0000    0.0000 C   0  0  0  0  0  0  0  0  0  0  0  0
    0.4125   -0.0000    0.0000 C   0  0  0  0  0  0  0  0  0  0  0  0
    1.2375   -0.0000    0.0000 C   0  0  0  0  0  0  0  0  0  0  0  0
    2.0625   -0.0000    0.0000 C   0  0  0  0  0  0  0  0  0  0  0  0
    2.8875   -0.0000    0.0000 C   0  0  0  0  0  0  0  0  0  0  0  0
    3.7125   -0.0000    0.0000 C   0  0  0  0  0  0  0  0  0  0  0  0
    4.5375   -0.0000    0.0000 C   0  0  0  0  0  0  0  0  0  0  0  0
    5.3625   -0.0000    0.0000 C   0  0  0  0  0  0  0  0  0  0  0  0
    5.7750   -0.7145    0.0000 C   0  0  0  0  0  0  0  0  0  0  0  0
    6.6000   -0.7145    0.0000 C   0  0  0  0  0  0  0  0  0  0  0  0
    7.0125   -0.0000    0.0000 C   0  0  0  0  0  0  0  0  0  0  0  0
    6.6000    0.7145    0.0000 C   0  0  0  0  0  0  0  0  0  0  0  0
    5.7750    0.7145    0.0000 C   0  0  0  0  0  0  0  0  0  0  0  0
  1  2  2  0      
  2  3  1  0      
  3  4  2  0      
  4  5  1  0      
  5  6  2  0      
  6  1  1  0      
  5  7  1  0      
  7  8  3  0      
  8  9  1  0      
  9 10  3  0      
 10 11  1  0      
 11 12  3  0      
 12 13  1  0      
 13 14  3  0      
 14 15  1  0      
 15 16  3  0      
 16 17  1  0      
 17 18  3  0      
 18 19  1  0      
 19 20  2  0      
 20 21  1  0      
 21 22  2  0      
 22 23  1  0      
 23 24  2  0      
 24 19  1  0      
M  END
